# Supplementary material
Source: PubMed Central journal article supplement (PMC4174926)
Supplement: 3d31b5b1561654938b885fa3c27bada5_genetics.114.166249-1.pdf [file 3d31b5b1561654938b885fa3c27bada5_genetics.114.166249-1.pdf]

# File S1

Supplementary Methods and Results for the paper  
“Bayesian modeling of haplotype effects in multiparent populations”  
July 14, 2014

Zhaojun Zhang, Wei Wang, and William Valdar

July 14, 2014

- Table 1 shows the 50 simulated effect vectors used in the simulation study, with each row being a single effect vector for eight founders. For CC population, the effects to the founders from A to H are assigned to 129S1/SvlmJ (129S1), A/J (AJ), C57BL/6J (B6), NOD/ShiLtJ (NOD), NZO/HILtJ (NZO), CAST/EiJ (CAST), PWK/PhJ (PWK), and WSB/EiJ (WSB), respectively. And For HS population, the effects are assigned to to A/J (AJ), AKR/J (AKR), BALBc/J (BALB), CBA/J (CBA), C3H/HeJ (C3H), C57BL/6J (B6), DBA/2J (DBA) and LP/J (LP), respectively.
- Table 2 and 3 show the simulation result based on Pre-CC population with mean values of two metrics and their 95% confident intervals. The data of the tables is used for generating Figure 3 and 4 in the main manuscript.
- Table 4 and 5 show the simulation result based on HS population with mean values of two metrics and their 95% confident intervals. The data of the tables is used for generating Figure 5 and 6 in the main manuscript.

| Strain | A       | B        | C       | D        | E       | F       | G        | H       |
|--------|---------|----------|---------|----------|---------|---------|----------|---------|
|        | 2       | 1        | 1       | 1        | 1       | 1       | 1        | 1       |
|        | 1       | 2        | 1       | 1        | 1       | 1       | 1        | 1       |
|        | 1       | 1        | 2       | 1        | 1       | 1       | 1        | 1       |
|        | 1       | 1        | 1       | 2        | 1       | 1       | 1        | 1       |
|        | 1       | 1        | 1       | 1        | 2       | 1       | 1        | 1       |
|        | 1       | 1        | 1       | 1        | 1       | 2       | 1        | 1       |
|        | 1       | 1        | 1       | 1        | 1       | 1       | 2        | 1       |
|        | 1       | 1        | 1       | 1        | 1       | 1       | 1        | 2       |
|        | 2       | 2        | 1       | 1        | 1       | 1       | 1        | 1       |
|        | 1       | 2        | 2       | 1        | 1       | 1       | 1        | 1       |
|        | 1       | 1        | 2       | 2        | 1       | 1       | 1        | 1       |
|        | 1       | 1        | 1       | 2        | 2       | 1       | 1        | 1       |
|        | 1       | 1        | 1       | 1        | 2       | 2       | 1        | 1       |
|        | 1       | 1        | 1       | 1        | 1       | 2       | 2        | 1       |
|        | 2       | 1        | 1       | 1        | 1       | 1       | 1        | 2       |
|        | 1       | 1        | 1       | 1        | 2       | 2       | 2        | 1       |
|        | 2       | 1        | 1       | 1        | 1       | 2       | 2        | 1       |
|        | 2       | 2        | 1       | 1        | 1       | 1       | 2        | 1       |
|        | 1       | 1        | 1       | 2        | 2       | 1       | 2        | 1       |
|        | 1       | 2        | 2       | 1        | 1       | 1       | 1        | 2       |
|        | 2       | 2        | 2       | 2        | 1       | 1       | 1        | 1       |
|        | 1       | 2        | 2       | 2        | 2       | 1       | 1        | 1       |
|        | 1       | 1        | 2       | 2        | 2       | 2       | 1        | 1       |
|        | 1       | 1        | 1       | 2        | 2       | 2       | 2        | 1       |
|        | 2       | 2        | 2       | 1        | 1       | 1       | 1        | 2       |
|        | 1.78    | 0.72     | -1.54   | 0.74     | -0.68   | -0.17   | -1.08    | 1.28    |
|        | -1.505  | 0.059    | 1.868   | 1.156    | 0.206   | -0.514  | -0.049   | -0.909  |
|        | -1.31   | -1.26    | 0.66    | -0.52    | -1.56   | -0.79   | -0.72    | 0.09    |
|        | -0.739  | -1.915   | 0.081   | 1.060    | -0.380  | 0.361   | 0.348    | 0.153   |
|        | 2.70    | 0.29     | 0.60    | -0.72    | -1.06   | -1.21   | 1.32     | -0.19   |
|        | 0.88    | -0.21    | 0.85    | 2.08     | -3.52   | -0.34   | -0.55    | -0.57   |
|        | 0.781   | -1.886   | 0.099   | 0.687    | 0.539   | 0.755   | -0.752   | -1.159  |
|        | 0.428   | -1.052   | 0.459   | 0.049    | -0.731  | 0.406   | -0.601   | -0.972  |
|        | -2.40   | 0.13     | 0.94    | 0.85     | 0.34    | -0.23   | 1.60     | 0.29    |
|        | 0.237   | 0.022    | 0.428   | -0.390   | 0.103   | -0.551  | -0.835   | -0.113  |
|        | -0.67   | -1.76    | 1.05    | 0.29     | 0.50    | -0.59   | -0.54    | -1.27   |
|        | -1.22   | -1.97    | 1.81    | -0.26    | -0.18   | -0.64   | -0.72    | -0.84   |
|        | -0.048  | 0.974    | 1.048   | 0.536    | -1.349  | -0.290  | 0.307    | 0.522   |
|        | 1.090   | -0.552   | -0.731  | 0.067    | -0.693  | -0.459  | -0.629   | -0.012  |
|        | 0.064   | -0.678   | 1.154   | 1.477    | -0.118  | -0.947  | 0.954    | 0.778   |
|        | -0.700  | 0.023    | -1.199  | -1.168   | -0.637  | -0.515  | 0.059    | 1.332   |
|        | -0.287  | -0.092   | -1.238  | 0.388    | -0.980  | -0.605  | -0.608   | 0.832   |
|        | -0.133  | -0.907   | -0.342  | 0.024    | 1.542   | -0.013  | 2.274    | 2.435   |
|        | -2.211  | -1.598   | -0.617  | -0.738   | 0.774   | -1.006  | -0.073   | -0.467  |
|        | 0.073   | 0.331    | -0.027  | -0.136   | -0.863  | 0.105   | 1.065    | -0.088  |
|        | 0.235   | -0.637   | -0.326  | 1.200    | 0.024   | -1.819  | 1.384    | -0.759  |
|        | 0.44028 | -0.46124 | 1.24133 | -0.57630 | 0.74145 | 0.00036 | -1.55446 | 0.37339 |
|        | 0.62    | 1.58     | 1.07    | -0.25    | 0.44    | -0.16   | -0.56    | 0.68    |
|        | -0.71   | 0.86     | 1.73    | -1.02    | -0.24   | -1.78   | -1.11    | -0.32   |
|        | -1.139  | 0.442    | -1.779  | -0.739   | 0.545   | -1.192  | 0.023    | 1.230   |

Table 1: A table of all effect vectors used in the simulation study.

| Simulated Effects   | Metric               | Model                       | QTL effect size |               |               |
|---------------------|----------------------|-----------------------------|-----------------|---------------|---------------|
|                     |                      |                             | 2.5%            | 5%            | 10%           |
| Additive            | Effect MSE           | <code>partial.lm</code>     | 2.174 (0.042)   | 1.096 (0.021) | 0.557 (0.011) |
|                     |                      | <code>ridge.add</code>      | 0.748 (0.010)   | 0.551 (0.009) | 0.340 (0.006) |
|                     |                      | <code>ridge.dom</code>      | 0.756 (0.008)   | 0.677 (0.009) | 0.537 (0.009) |
|                     |                      | <code>DF.MCMC.pseudo</code> | 0.678 (0.011)   | 0.467 (0.007) | 0.337 (0.006) |
|                     |                      | <code>DF.MCMC</code>        | 0.712 (0.014)   | 0.472 (0.008) | 0.305 (0.005) |
|                     |                      | <code>DF.IS.noweight</code> | 0.706 (0.014)   | 0.471 (0.008) | 0.362 (0.006) |
|                     |                      | <code>DF.IS</code>          | 0.703 (0.014)   | 0.469 (0.008) | 0.333 (0.006) |
|                     | Effect Rank Accuracy | <code>partial.lm</code>     | 0.537 (0.009)   | 0.656 (0.007) | 0.741 (0.005) |
|                     |                      | <code>ridge.add</code>      | 0.537 (0.009)   | 0.656 (0.007) | 0.742 (0.005) |
|                     |                      | <code>ridge.dom</code>      | 0.535 (0.009)   | 0.652 (0.007) | 0.738 (0.005) |
|                     |                      | <code>DF.MCMC.pseudo</code> | 0.519 (0.010)   | 0.638 (0.008) | 0.722 (0.006) |
|                     |                      | <code>DF.MCMC</code>        | 0.531 (0.010)   | 0.653 (0.007) | 0.741 (0.005) |
|                     |                      | <code>DF.IS.noweight</code> | 0.531 (0.009)   | 0.654 (0.007) | 0.740 (0.005) |
|                     |                      | <code>DF.IS</code>          | 0.534 (0.010)   | 0.654 (0.007) | 0.739 (0.006) |
| Additive + Dominant | Effect MSE           | <code>partial.lm</code>     | 2.242 (0.048)   | 1.170 (0.025) | 0.635 (0.014) |
|                     |                      | <code>ridge.add</code>      | 0.775 (0.012)   | 0.578 (0.010) | 0.376 (0.008) |
|                     |                      | <code>ridge.dom</code>      | 0.762 (0.007)   | 0.685 (0.008) | 0.561 (0.008) |
|                     |                      | <code>DF.MCMC.pseudo</code> | 0.701 (0.013)   | 0.493 (0.008) | 0.388 (0.007) |
|                     |                      | <code>DF.MCMC</code>        | 0.740 (0.016)   | 0.498 (0.009) | 0.335 (0.006) |
|                     |                      | <code>DF.IS.noweight</code> | 0.729 (0.015)   | 0.494 (0.009) | 0.384 (0.006) |
|                     |                      | <code>DF.IS</code>          | 0.728 (0.016)   | 0.492 (0.009) | 0.360 (0.006) |
| Additive + Dominant | Effect Rank Accuracy | <code>partial.lm</code>     | 0.535 (0.010)   | 0.646 (0.008) | 0.727 (0.006) |
|                     |                      | <code>ridge.add</code>      | 0.535 (0.010)   | 0.647 (0.007) | 0.731 (0.006) |
|                     |                      | <code>ridge.dom</code>      | 0.535 (0.010)   | 0.645 (0.007) | 0.729 (0.006) |
|                     |                      | <code>DF.MCMC.pseudo</code> | 0.514 (0.010)   | 0.624 (0.008) | 0.700 (0.006) |
|                     |                      | <code>DF.MCMC</code>        | 0.527 (0.010)   | 0.643 (0.008) | 0.729 (0.006) |
|                     |                      | <code>DF.IS.noweight</code> | 0.531 (0.010)   | 0.645 (0.007) | 0.729 (0.006) |
|                     |                      | <code>DF.IS</code>          | 0.530 (0.010)   | 0.643 (0.008) | 0.728 (0.006) |

Table 2: Performance of the methods applied on CC population with simulated phenotypes. The table shows the mean values of either prediction error or rank accuracy with halved 95% confidence interval size in parentheses.

| Simulated Effects   | Metric               | Model                       | QTL effect size |               |               |
|---------------------|----------------------|-----------------------------|-----------------|---------------|---------------|
|                     |                      |                             | 20%             | 30%           | 40%           |
| Additive            | Effect MSE           | <code>partial.lm</code>     | 0.288 (0.006)   | 0.199 (0.005) | 0.154 (0.005) |
|                     |                      | <code>ridge.add</code>      | 0.174 (0.003)   | 0.109 (0.002) | 0.076 (0.001) |
|                     |                      | <code>ridge.dom</code>      | 0.348 (0.007)   | 0.254 (0.006) | 0.196 (0.005) |
|                     |                      | <code>DF.MCMC.pseudo</code> | 0.192 (0.004)   | 0.134 (0.003) | 0.100 (0.002) |
|                     |                      | <code>DF.MCMC</code>        | 0.166 (0.003)   | 0.102 (0.002) | 0.068 (0.001) |
|                     |                      | <code>DF.IS.noweight</code> | 0.237 (0.005)   | 0.169 (0.004) | 0.130 (0.003) |
|                     |                      | <code>DF.IS</code>          | 0.188 (0.004)   | 0.120 (0.003) | 0.086 (0.002) |
|                     | Effect Rank Accuracy | <code>partial.lm</code>     | 0.793 (0.005)   | 0.813 (0.005) | 0.825 (0.005) |
|                     |                      | <code>ridge.add</code>      | 0.797 (0.005)   | 0.818 (0.005) | 0.831 (0.005) |
|                     |                      | <code>ridge.dom</code>      | 0.791 (0.005)   | 0.814 (0.005) | 0.826 (0.005) |
|                     |                      | <code>DF.MCMC.pseudo</code> | 0.784 (0.005)   | 0.807 (0.005) | 0.821 (0.005) |
|                     |                      | <code>DF.MCMC</code>        | 0.797 (0.005)   | 0.818 (0.005) | 0.830 (0.005) |
|                     |                      | <code>DF.IS.noweight</code> | 0.793 (0.005)   | 0.814 (0.005) | 0.825 (0.005) |
|                     |                      | <code>DF.IS</code>          | 0.796 (0.005)   | 0.815 (0.005) | 0.828 (0.005) |
| Additive + Dominant | Effect MSE           | <code>partial.lm</code>     | 0.369 (0.009)   | 0.281 (0.008) | 0.237 (0.007) |
|                     |                      | <code>ridge.add</code>      | 0.219 (0.005)   | 0.158 (0.004) | 0.127 (0.003) |
|                     |                      | <code>ridge.dom</code>      | 0.399 (0.008)   | 0.321 (0.007) | 0.273 (0.006) |
|                     |                      | <code>DF.MCMC.pseudo</code> | 0.246 (0.005)   | 0.184 (0.004) | 0.152 (0.003) |
|                     |                      | <code>DF.MCMC</code>        | 0.203 (0.004)   | 0.140 (0.004) | 0.105 (0.004) |
|                     |                      | <code>DF.IS.noweight</code> | 0.274 (0.005)   | 0.213 (0.005) | 0.175 (0.004) |
|                     |                      | <code>DF.IS</code>          | 0.227 (0.005)   | 0.163 (0.004) | 0.123 (0.003) |
| Additive + Dominant | Effect Rank Accuracy | <code>partial.lm</code>     | 0.777 (0.005)   | 0.797 (0.005) | 0.806 (0.005) |
|                     |                      | <code>ridge.add</code>      | 0.782 (0.005)   | 0.802 (0.005) | 0.812 (0.005) |
|                     |                      | <code>ridge.dom</code>      | 0.784 (0.005)   | 0.805 (0.005) | 0.817 (0.005) |
|                     |                      | <code>DF.MCMC.pseudo</code> | 0.762 (0.005)   | 0.788 (0.005) | 0.797 (0.005) |
|                     |                      | <code>DF.MCMC</code>        | 0.784 (0.005)   | 0.805 (0.005) | 0.817 (0.006) |
|                     |                      | <code>DF.IS.noweight</code> | 0.780 (0.005)   | 0.800 (0.005) | 0.810 (0.005) |
|                     |                      | <code>DF.IS</code>          | 0.782 (0.005)   | 0.801 (0.005) | 0.811 (0.005) |

Table 3: Performance of the methods applied on CC population with simulated phenotypes. The table shows the mean values of either prediction error or rank accuracy with halved 95% confidence interval size in parentheses.

| Simulated Effects   | Metric               | Model                       | QTL effect size |                |                |
|---------------------|----------------------|-----------------------------|-----------------|----------------|----------------|
|                     |                      |                             | 2.5%            | 5%             | 10%            |
| Additive            | Effect MSE           | <code>partial.lm</code>     | 32.678 (1.697)  | 19.145 (1.085) | 12.427 (0.763) |
|                     |                      | <code>ridge.add</code>      | 41.639 (3.217)  | 19.961 (1.556) | 9.692 (0.715)  |
|                     |                      | <code>ridge.dom</code>      | 2293 (603)      | 1156 (289)     | 599 (156.9)    |
|                     |                      | <code>DF.IS.noweight</code> | 0.850 (0.007)   | 0.814 (0.007)  | 0.803 (0.006)  |
|                     |                      | <code>DF.IS.kinship</code>  | 1.136 (0.020)   | 0.902 (0.015)  | 0.797 (0.013)  |
|                     |                      | <code>DF.IS</code>          | 0.915 (0.031)   | 0.813 (0.010)  | 0.764 (0.008)  |
|                     | Effect Rank Accuracy | <code>partial.lm</code>     | 0.186 (0.014)   | 0.245 (0.013)  | 0.310 (0.012)  |
|                     |                      | <code>ridge.add</code>      | 0.178 (0.014)   | 0.241 (0.014)  | 0.311 (0.013)  |
|                     |                      | <code>ridge.dom</code>      | 0.095 (0.010)   | 0.126 (0.010)  | 0.160 (0.010)  |
|                     |                      | <code>DF.IS.noweight</code> | 0.318 (0.012)   | 0.393 (0.011)  | 0.457 (0.009)  |
|                     |                      | <code>DF.IS.kinship</code>  | 0.246 (0.013)   | 0.325 (0.015)  | 0.398 (0.015)  |
|                     |                      | <code>DF.IS</code>          | 0.296 (0.030)   | 0.364 (0.012)  | 0.442 (0.010)  |
| Additive + Dominant | Effect MSE           | <code>partial.lm</code>     | 16.954 (0.909)  | 10.486 (0.602) | 7.111 (0.444)  |
|                     |                      | <code>ridge.add</code>      | 18.434 (1.222)  | 10.580 (0.666) | 5.805 (0.343)  |
|                     |                      | <code>ridge.dom</code>      | 1085 (256)      | 557 (142)      | 275 (68.40)    |
|                     |                      | <code>DF.IS.noweight</code> | 0.910 (0.004)   | 0.892 (0.003)  | 0.887 (0.003)  |
|                     |                      | <code>DF.IS.kinship</code>  | 1.051 (0.011)   | 0.936 (0.007)  | 0.887 (0.006)  |
|                     |                      | <code>DF.IS</code>          | 0.946 (0.008)   | 0.893 (0.006)  | 0.867 (0.004)  |
|                     | Effect Rank Accuracy | <code>partial.lm</code>     | 0.146 (0.010)   | 0.176 (0.010)  | 0.218 (0.009)  |
|                     |                      | <code>ridge.add</code>      | 0.122 (0.011)   | 0.160 (0.010)  | 0.205 (0.010)  |
|                     |                      | <code>ridge.dom</code>      | 0.073 (0.009)   | 0.101 (0.008)  | 0.137 (0.009)  |
|                     |                      | <code>DF.IS.noweight</code> | 0.229 (0.009)   | 0.276 (0.008)  | 0.313 (0.008)  |
|                     |                      | <code>DF.IS.kinship</code>  | 0.180 (0.010)   | 0.229 (0.010)  | 0.270 (0.011)  |
|                     |                      | <code>DF.IS</code>          | 0.220 (0.010)   | 0.258 (0.009)  | 0.309 (0.008)  |

Table 4: Performance of the methods applied on HS population with simulated phenotypes. The table shows the mean values of either prediction error or rank accuracy with halved 95% confidence interval size in parentheses.

| Simulated Effects   | Metric               | Model                       | QTL effect size |               |               |
|---------------------|----------------------|-----------------------------|-----------------|---------------|---------------|
|                     |                      |                             | 20%             | 30%           | 40%           |
| Additive            | Effect MSE           | <code>partial.lm</code>     | 9.103 (0.590)   | 8.008 (0.529) | 7.467 (0.498) |
|                     |                      | <code>ridge.add</code>      | 4.566 (0.296)   | 2.959 (0.171) | 2.293 (0.146) |
|                     |                      | <code>ridge.dom</code>      | 270 (74.24)     | 164 (46.05)   | 111 (29.70)   |
|                     |                      | <code>DF.IS.noweight</code> | 0.785 (0.006)   | 0.775 (0.007) | 0.768 (0.007) |
|                     |                      | <code>DF.IS.kinship</code>  | 0.744 (0.012)   | 0.702 (0.013) | 0.709 (0.011) |
|                     |                      | <code>DF.IS</code>          | 0.733 (0.008)   | 0.721 (0.008) | 0.714 (0.008) |
|                     | Effect Rank Accuracy | <code>partial.lm</code>     | 0.371 (0.011)   | 0.399 (0.011) | 0.416 (0.010) |
|                     |                      | <code>ridge.add</code>      | 0.394 (0.012)   | 0.447 (0.012) | 0.483 (0.011) |
|                     |                      | <code>ridge.dom</code>      | 0.202 (0.010)   | 0.233 (0.010) | 0.254 (0.010) |
|                     |                      | <code>DF.IS.noweight</code> | 0.502 (0.008)   | 0.516 (0.008) | 0.526 (0.008) |
|                     |                      | <code>DF.IS.kinship</code>  | 0.460 (0.014)   | 0.489 (0.013) | 0.505 (0.012) |
|                     |                      | <code>DF.IS</code>          | 0.488 (0.009)   | 0.501 (0.009) | 0.516 (0.009) |
| Additive + Dominant | Effect MSE           | <code>partial.lm</code>     | 5.414 (0.354)   | 4.845 (0.320) | 4.558 (0.301) |
|                     |                      | <code>ridge.add</code>      | 3.249 (0.164)   | 2.471 (0.115) | 2.116 (0.110) |
|                     |                      | <code>ridge.dom</code>      | 124 (30.90)     | 78 (19.99)    | 55 (13.51)    |
|                     |                      | <code>DF.IS.noweight</code> | 0.879 (0.003)   | 0.874 (0.003) | 0.870 (0.003) |
|                     |                      | <code>DF.IS.kinship</code>  | 0.859 (0.006)   | 0.837 (0.007) | 0.840 (0.005) |
|                     |                      | <code>DF.IS</code>          | 0.854 (0.004)   | 0.849 (0.004) | 0.844 (0.004) |
|                     | Effect Rank Accuracy | <code>partial.lm</code>     | 0.260 (0.009)   | 0.280 (0.008) | 0.292 (0.008) |
|                     |                      | <code>ridge.add</code>      | 0.261 (0.010)   | 0.293 (0.009) | 0.316 (0.009) |
|                     |                      | <code>ridge.dom</code>      | 0.179 (0.009)   | 0.208 (0.009) | 0.229 (0.009) |
|                     |                      | <code>DF.IS.noweight</code> | 0.346 (0.007)   | 0.357 (0.007) | 0.366 (0.006) |
|                     |                      | <code>DF.IS.kinship</code>  | 0.309 (0.010)   | 0.340 (0.010) | 0.348 (0.009) |
|                     |                      | <code>DF.IS</code>          | 0.336 (0.008)   | 0.345 (0.008) | 0.357 (0.007) |

Table 5: Performance of the methods applied on HS population with simulated phenotypes. The table shows the mean values of either prediction error or rank accuracy with halved 95% confidence interval size in parentheses.

| Simulated Effects   | 2.5% QTL        | 5% QTL          | 10% QTL         | 20% QTL         | 30% QTL         | 40% QTL         |
|---------------------|-----------------|-----------------|-----------------|-----------------|-----------------|-----------------|
| Additive            | 0.0010 (0.0001) | 0.0014 (0.0001) | 0.0025 (0.0001) | 0.0051 (0.0001) | 0.0083 (0.0002) | 0.0125 (0.0003) |
| Additive + Dominant | 0.0013 (0.0001) | 0.0017 (0.0001) | 0.0032 (0.0001) | 0.0066 (0.0001) | 0.0108 (0.0002) | 0.0163 (0.0003) |

Table 6: The table shows the mean values of TDI with halved 95% confidence interval size in parentheses.

**Files S2-S4**

**Available for download as .gz files at <http://www.genetics.org/lookup/suppl/doi:10.1534/genetics.114.166249/-/DC1>**

**File S2** Computer code, including simulation and example code

**File S3** Data used in the simulations

**File S4** Real data examples used
